# Supplementary material for: Metabolomics study on the hepatoprotective effect of scoparone using ultra-performance liquid chromatography/electrospray ionization quadruple time-of-flight mass spectrometry
Source: Royal Society of Chemistry journal article supplement (doi:10.1039/c2an36382h), 2012-10-23
Supplement: c2an36382h.pdf [file c2an36382h.pdf]

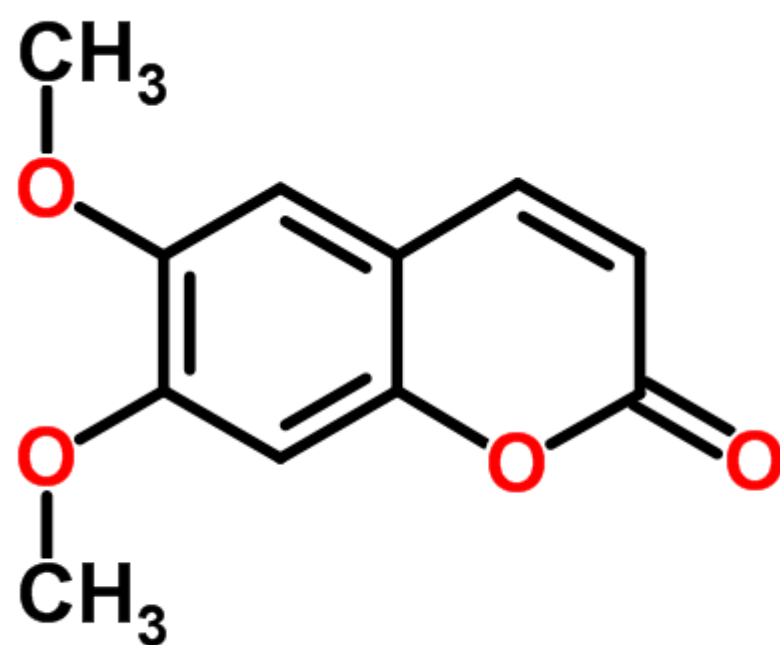

**Fig.1.** Chemical structures of scoparone.

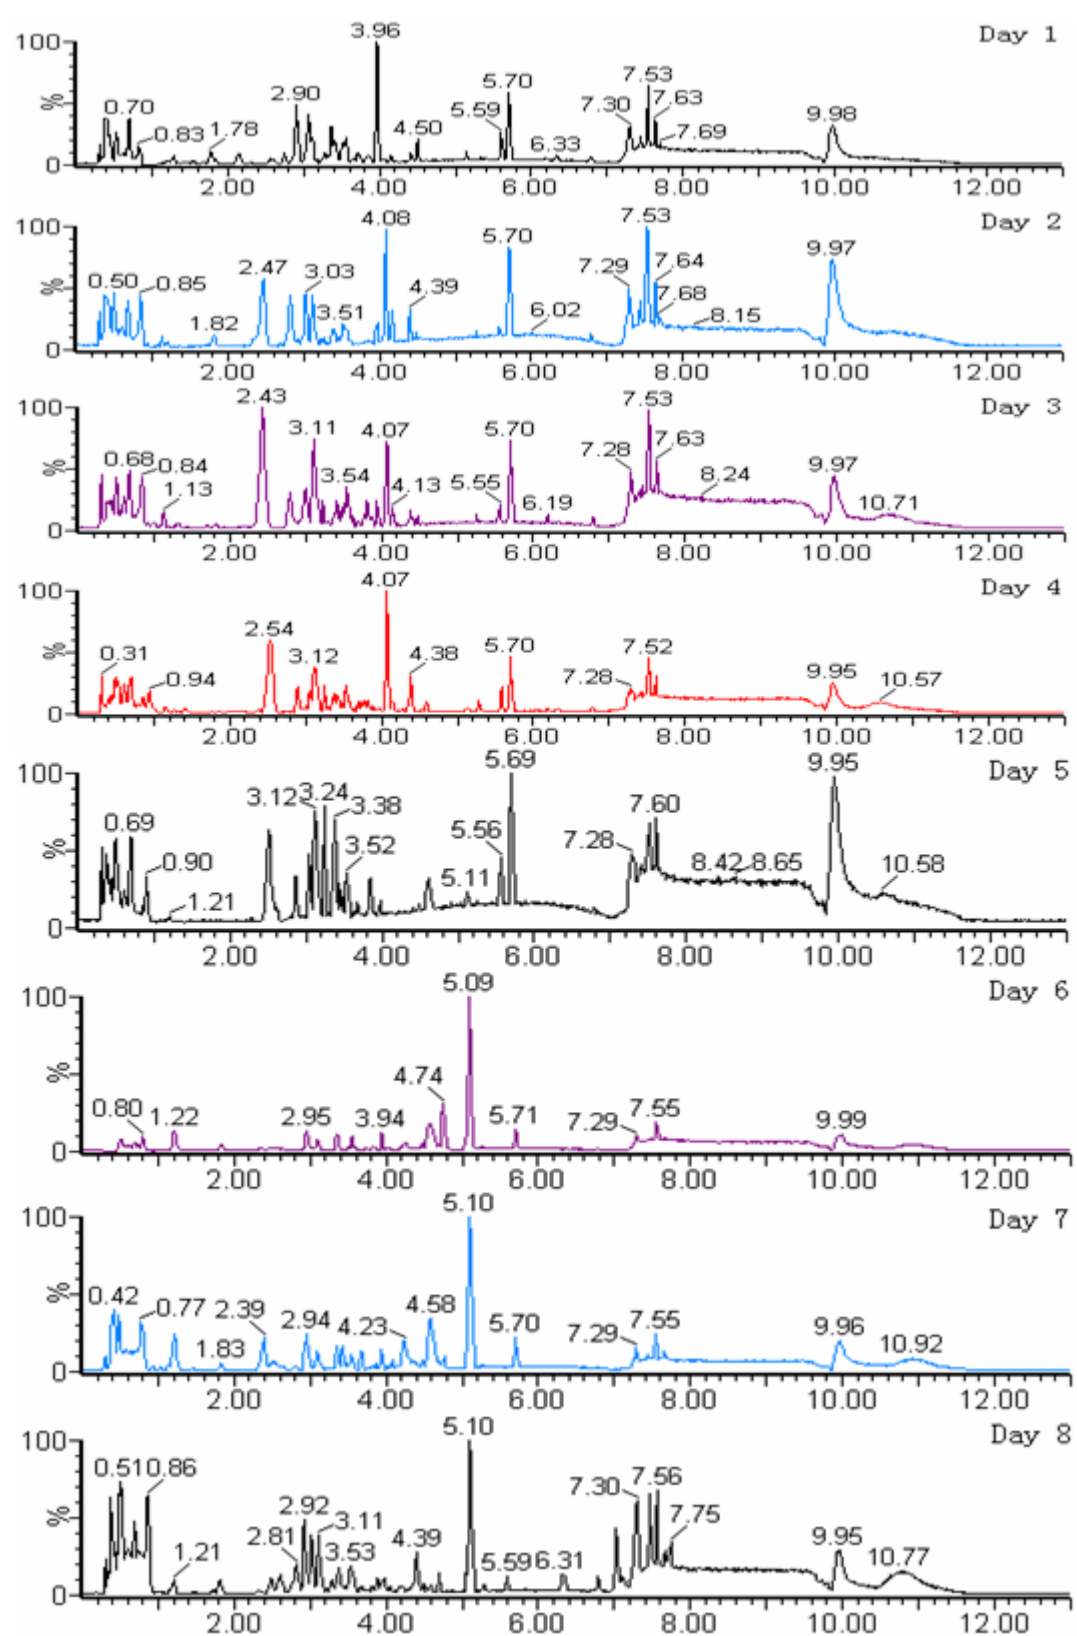

**Fig.2.** BPI chromatograms of urine obtain from UPLC/ESI-Q-TOF/MS analysis for continuous eight days.
